# Supplementary material for: The NAC transcription factor ANAC046 is a positive regulator of chlorophyll degradation and senescence in Arabidopsis leaves
Source: PubMed Central journal article supplement (PMC4810360; doi:10.1038/srep23609), 2016-03-29
Supplement: srep23609-s1.pdf [file srep23609-s1.pdf]

# The NAC transcription factor ANAC046 is a positive regulator of chlorophyll degradation and senescence in Arabidopsis leaves

Chihiro Oda-Yamamizo, Nobutaka Mitsuda, Shingo Sakamoto,  
Daisuke Ogawa, Masaru Ohme-Takagi and Akemi Ohmiya

## Supplementary Figure S1

| Locus     | Alias             | TF classification | CYP89 A9 | HCAR | RCCR | MES16 | PPH | NOL | NYC1 | PaO | SGR1 | SGR2 |
|-----------|-------------------|-------------------|----------|------|------|-------|-----|-----|------|-----|------|------|
| AT3G12680 | HUA1              | C3HZnF            | 0        | 0    | 0    | 0     | 0   | 0   | 0    | 0   | 1    | 0    |
| AT3G02830 | PNT1, ZFN1        | C3HZnF            | 0        | 0    | 0    | 0     | 0   | 0   | 0    | 0   | 1    | 0    |
| AT3G49610 |                   | B3                | 0        | 0    | 0    | 0     | 0   | 0   | 0    | 0   | 2    | 0    |
| AT1G32640 | JIN1, JAI1, ZBF1, | bHLH              | 0        | 0    | 0    | 0     | 0   | 0   | 0    | 2   | 0    | 0    |
| AT2G21230 | AtbZIP30          | bZIP              | 0        | 0    | 0    | 0     | 0   | 0   | 0    | 2   | 0    | 1    |
| AT4G38900 | AtbZIP29          | bZIP              | 0        | 0    | 0    | 0     | 0   | 0   | 0    | 3   | 0    | 1    |
| AT1G75390 | ATBZIP44          | bZIP              | 0        | 0    | 0    | 0     | 0   | 1   | 0    | 0   | 0    | 0    |
| AT1G32150 | AtbZIP68          | bZIP              | 0        | 0    | 0    | 0     | 0   | 3   | 2    | 0   | 0    | 0    |
| AT2G46270 | GBF3              | bZIP              | 0        | 0    | 0    | 0     | 0   | 3   | 3    | 0   | 0    | 0    |
| AT4G36730 | AtGBF1, GBF1      | bZIP              | 0        | 0    | 0    | 0     | 0   | 3   | 3    | 0   | 0    | 0    |
| AT1G12260 | ANAC007, VND4,    | NAC               | 0        | 0    | 0    | 0     | 0   | 0   | 1    | 0   | 0    | 0    |
| AT1G32510 | ANAC011           | NAC               | 0        | 0    | 0    | 0     | 0   | 0   | 1    | 0   | 0    | 0    |
| AT5G46590 | ANAC096           | NAC               | 0        | 0    | 0    | 0     | 0   | 0   | 1    | 0   | 0    | 0    |
| AT1G34180 | ANAC016           | NAC               | 0        | 0    | 0    | 0     | 0   | 0   | 2    | 0   | 0    | 0    |
| AT3G10500 | NIL4, ANAC053,    | NAC               | 0        | 0    | 0    | 0     | 0   | 0   | 3    | 0   | 0    | 0    |
| AT3G03200 | ANAC045           | NAC               | 0        | 0    | 0    | 0     | 0   | 0   | 2    | 0   | 0    | 1    |
| AT3G17730 | ANAC057           | NAC               | 0        | 0    | 0    | 0     | 0   | 0   | 3    | 0   | 0    | 1    |
| AT4G10350 | BRN2, NST4,       | NAC               | 0        | 0    | 0    | 0     | 0   | 0   | 3    | 0   | 0    | 1    |
| AT1G76420 | NAC368, CUC3,     | NAC               | 0        | 0    | 0    | 0     | 0   | 0   | 0    | 0   | 1    | 1    |
| AT3G15170 | ATNAC1, CUC1,     | NAC               | 0        | 0    | 0    | 0     | 0   | 0   | 0    | 0   | 1    | 1    |
| AT1G56010 | NAC1, ANAC021,    | NAC               | 0        | 0    | 0    | 0     | 0   | 0   | 0    | 0   | 3    | 1    |
| AT1G33280 | BRN1, ANAC015,    | NAC               | 0        | 0    | 0    | 0     | 0   | 0   | 1    | 0   | 0    | 3    |
| AT2G18060 | ANAC037, VND1     | NAC               | 0        | 0    | 0    | 0     | 0   | 0   | 0    | 0   | 0    | 1    |
| AT1G79580 | URP7, ANAC033,    | NAC               | 0        | 0    | 0    | 0     | 0   | 0   | 0    | 0   | 0    | 1    |
| AT1G52880 | ATNAM, NAM,       | NAC               | 0        | 0    | 0    | 0     | 0   | 0   | 0    | 0   | 0    | 1    |
| AT1G52890 | ANAC019           | NAC               | 0        | 0    | 0    | 0     | 0   | 0   | 0    | 0   | 0    | 1    |
| AT1G61110 | ANAC025           | NAC               | 0        | 0    | 0    | 0     | 0   | 0   | 0    | 0   | 0    | 2    |
| AT5G49420 | ATAF1, ANAC002    | NAC               | 0        | 0    | 0    | 0     | 0   | 0   | 0    | 0   | 0    | 3    |
| AT2G24430 | ANAC039,          | NAC               | 0        | 0    | 0    | 0     | 0   | 0   | 0    | 0   | 0    | 3    |
| AT1G65910 | ANAC028           | NAC               | 0        | 0    | 0    | 0     | 0   | 0   | 2    | 0   | 0    | 3    |
| AT1G71930 | VND7, ANAC030     | NAC               | 0        | 0    | 0    | 0     | 0   | 0   | 1    | 0   | 0    | 1    |
| AT1G54330 | ANAC020           | NAC               | 0        | 0    | 0    | 0     | 0   | 0   | 3    | 0   | 0    | 3    |
| AT5G53950 | ATCUC2, CUC2,     | NAC               | 0        | 0    | 0    | 0     | 0   | 0   | 1    | 0   | 0    | 1    |
| AT3G18400 | ANAC058           | NAC               | 0        | 0    | 0    | 0     | 0   | 0   | 0    | 2   | 0    | 1    |
| AT4G28530 | ANAC074           | NAC               | 0        | 0    | 0    | 0     | 0   | 0   | 2    | 2   | 0    | 3    |
| AT3G15500 | ATNAC3,           | NAC               | 0        | 0    | 0    | 0     | 0   | 0   | 0    | 2   | 0    | 3    |
| AT5G07680 | ANAC079,          | NAC               | 0        | 0    | 0    | 0     | 0   | 0   | 0    | 3   | 1    | 3    |
| AT5G39610 | ORE1, ANAC2,      | NAC               | 0        | 0    | 0    | 0     | 0   | 0   | 1    | 3   | 1    | 3    |
| AT3G04060 | ANAC046           | NAC               | 0        | 0    | 0    | 0     | 0   | 0   | 3    | 3   | 3    | 3    |
| AT5G18270 | ANAC087           | NAC               | 0        | 0    | 0    | 0     | 0   | 0   | 3    | 3   | 3    | 3    |
| AT5G61430 | ANAC100,          | NAC               | 0        | 0    | 0    | 0     | 0   | 0   | 3    | 3   | 3    | 3    |
| AT1G76500 | SOB3, AHL29       | AT-hook           | 3        | 2    | 0    | 0     | 0   | 0   | 0    | 0   | 0    | 0    |
| AT1G20900 | ORE7, AHL27,      | AT-hook           | 3        | 3    | 0    | 0     | 0   | 0   | 0    | 0   | 0    | 0    |
| AT3G55560 | AHL15, AGF2       | AT-hook           | 3        | 3    | 0    | 0     | 0   | 0   | 0    | 0   | 0    | 0    |
| AT3G04570 | AHL19             | AT-hook           | 0        | 3    | 0    | 0     | 0   | 0   | 0    | 0   | 0    | 0    |
| AT1G14490 | AHL28             | AT-hook           | 0        | 3    | 0    | 0     | 0   | 0   | 0    | 0   | 0    | 0    |
| AT2G42940 | TEK, AHL16        | AT-hook           | 0        | 1    | 0    | 0     | 0   | 0   | 0    | 0   | 0    | 0    |
| AT4G35390 | AHL25, AGF1       | AT-hook           | 0        | 2    | 0    | 0     | 0   | 0   | 0    | 0   | 0    | 0    |
| AT4G22810 | AHL24             | AT-hook           | 0        | 2    | 0    | 0     | 0   | 0   | 0    | 0   | 0    | 0    |
| AT4G12050 | AHL26             | AT-hook           | 0        | 2    | 0    | 0     | 0   | 0   | 0    | 0   | 0    | 0    |
| AT5G49700 | AHL17             | AT-hook           | 1        | 3    | 0    | 0     | 0   | 0   | 0    | 0   | 0    | 0    |
| AT5G21120 | EIL2              | EIL               | 0        | 0    | 0    | 3     | 0   | 0   | 0    | 0   | 0    | 0    |
| AT5G39750 | AGL81, EMB3008    | MADS              | 0        | 0    | 1    | 2     | 0   | 0   | 0    | 0   | 0    | 0    |

Supplementary Figure S1. Transcription factors (TFs) that bind to the promoter regions of Chl catabolic genes as detected by Y1H screening. The numbers in the table indicate the signal strength (0=weak to 3=strong) of each clone judged by visual inspection.

## Supplementary Figure S2

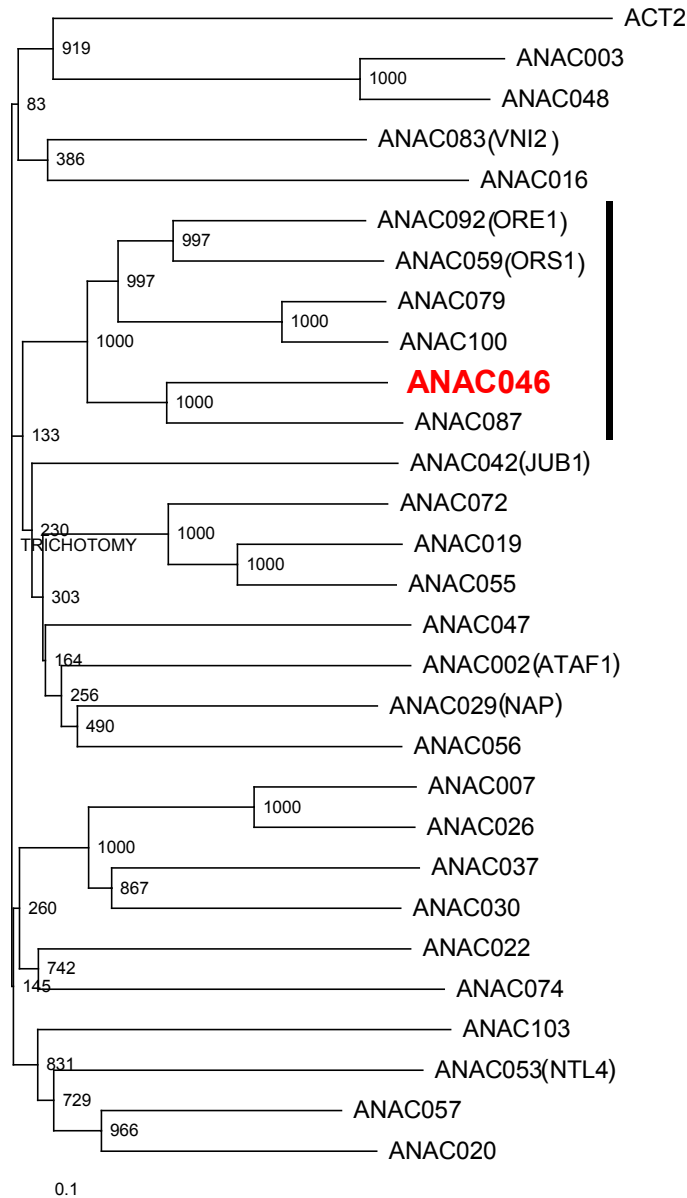

**Supplementary Figure S2. Phylogenetic tree based on the entire amino acid sequences of senescence-inducible NAC transcription factors in Arabidopsis.** Phylogenetic relationship was deduced by using the neighbor-joining method. The frequency with which a given branch appeared in 1000 bootstrap replications is indicated at the nodes. Vertical bar indicates the NAM subgroup. Scale bar indicates 0.1 amino acid substitutions per site.

## Supplementary Figure S3

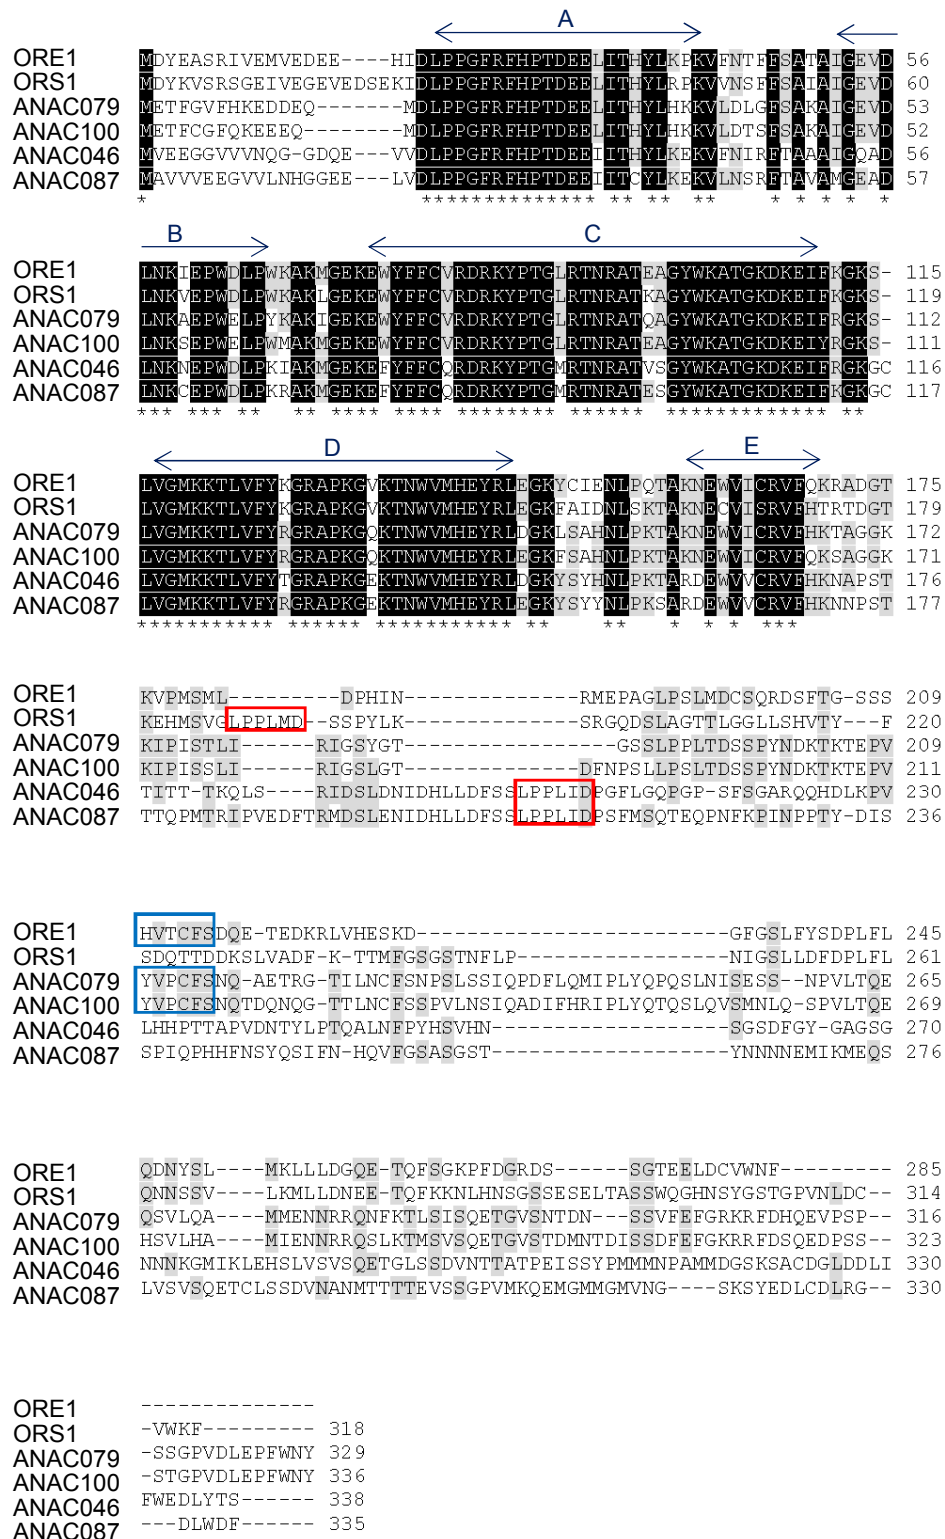

**Supplementary Figure S3. Alignment of deduced amino acid sequences of transcription factors of the NAM subgroup.** Multiple sequence alignment was performed with ClustalW. Amino acids completely conserved within the NAM subgroup are shaded in black and those conserved in more than three sequences are shaded in gray. Red squares indicate motif conserved within the NAM subgroup and blue squares indicate sequences corresponding to the predicted miR164 target sites. A–E, highly conserved subdomains within the NAC domain.

## Supplementary Figure S4

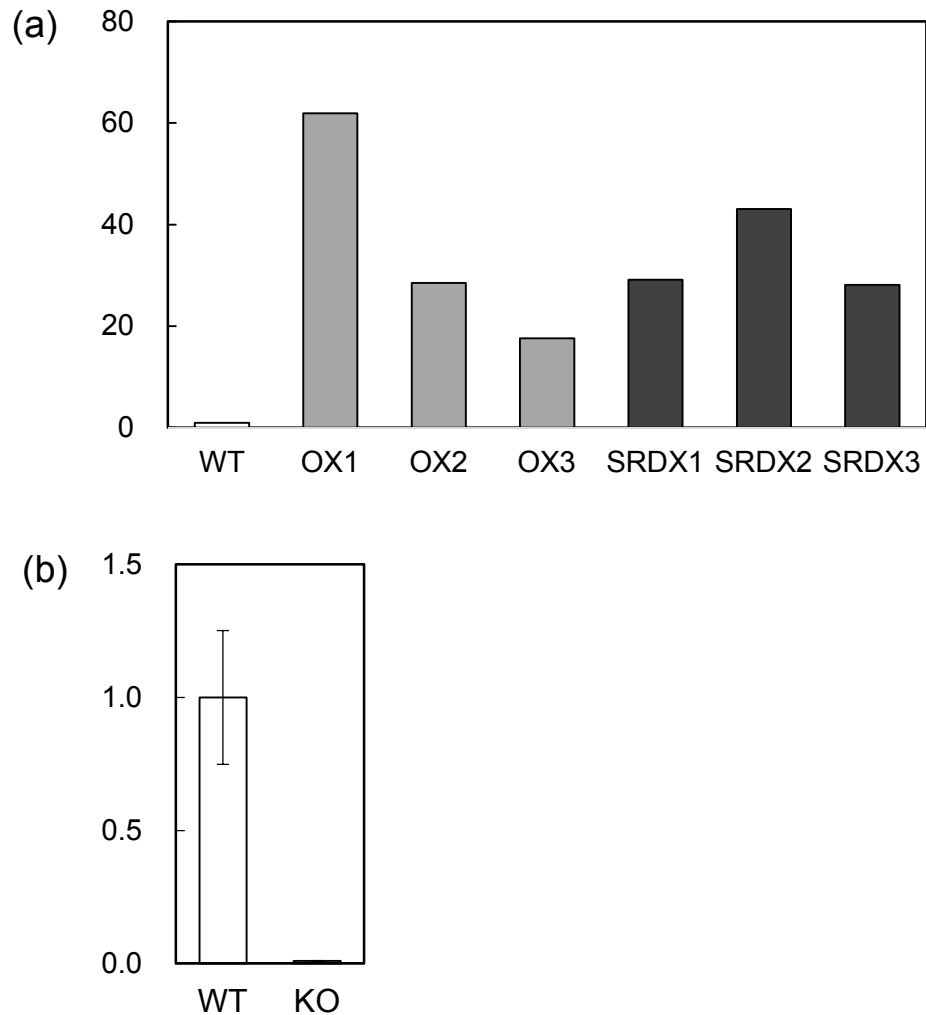

**Supplementary Figure S4. Expression of ANAC046 in OX, SRDX, and KO plants.** (a) Expression of *ANAC046* in OX and SRDX plants. Three independent transgenic lines were analyzed. The data represent values of single replicate. (b) Expression of *ANAC046* in KO plants. Data are means  $\pm$ SD of three technical replicates. Relative expression was analyzed by quantitative real-time PCR using *ANAC046* specific primers (Table S4).

## Supplementary Figure S5

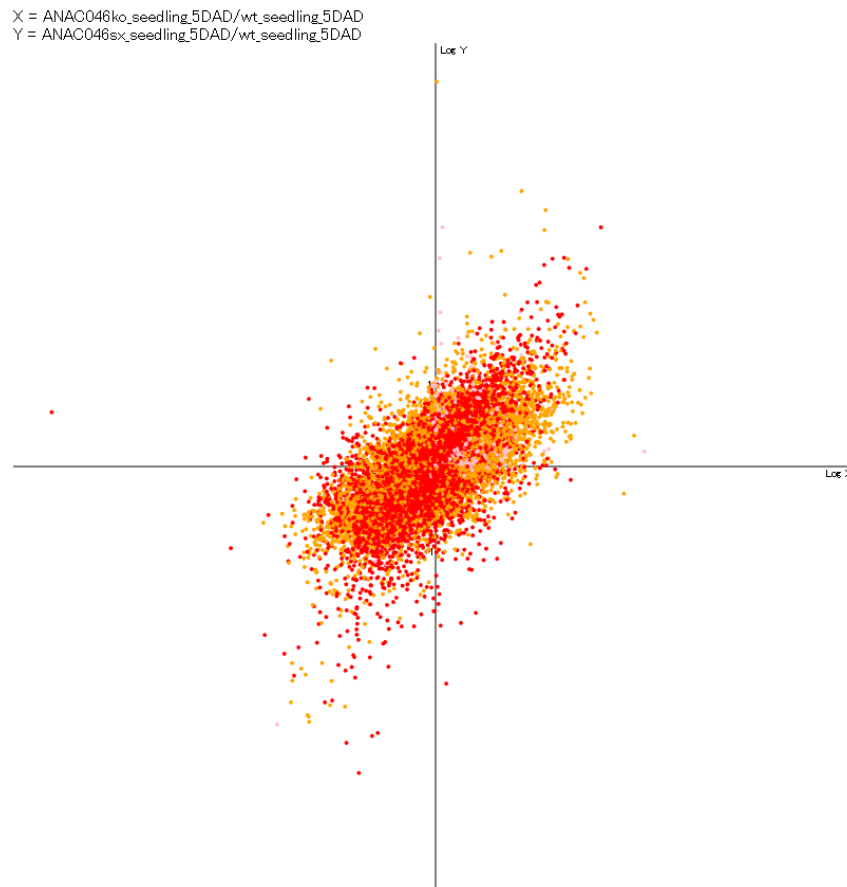

**Supplementary Figure S5. Scatter plot of log values of fold changes in the expression of all genes in a KO plant (X axis) and SRDX plant (Y axis).** Fold changes were well correlated between the two plants. Red, orange, and pink dots represent genes expressed at a high level (average detection value in KO and SRDX plants  $\geq 1.5$ ), marginal level (average detection value  $\geq 0.5$ ), and low level (average detection value  $< 0.5$ ), respectively.

## Supplementary Figure S6

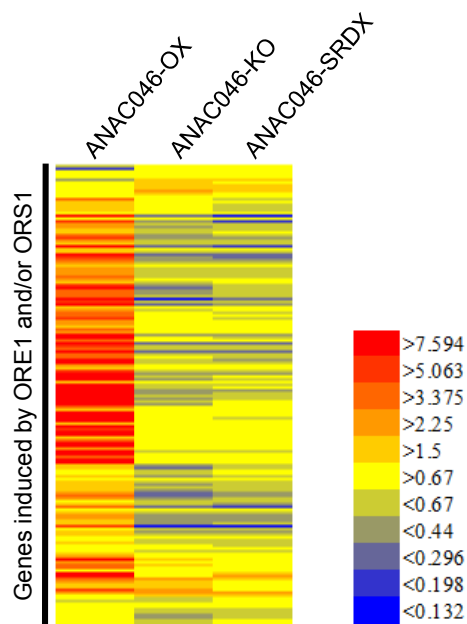

**Supplementary Figure S6. Expression of ORE1- and/or ORS1-inducible genes in the ANAC046 OX, KO, and SRDX plants.** Color indicates level of fold change in each transgenic/mutant plant against wild-type plant.. The list of ORE1- and ORS1-inducible genes was obtained from Balazadeh et al. (2010)<sup>20</sup>, Balazadeh et al. (2011)<sup>24</sup>, and Matallana-Ramirez et al. (2013).

Supplementary Figure S7

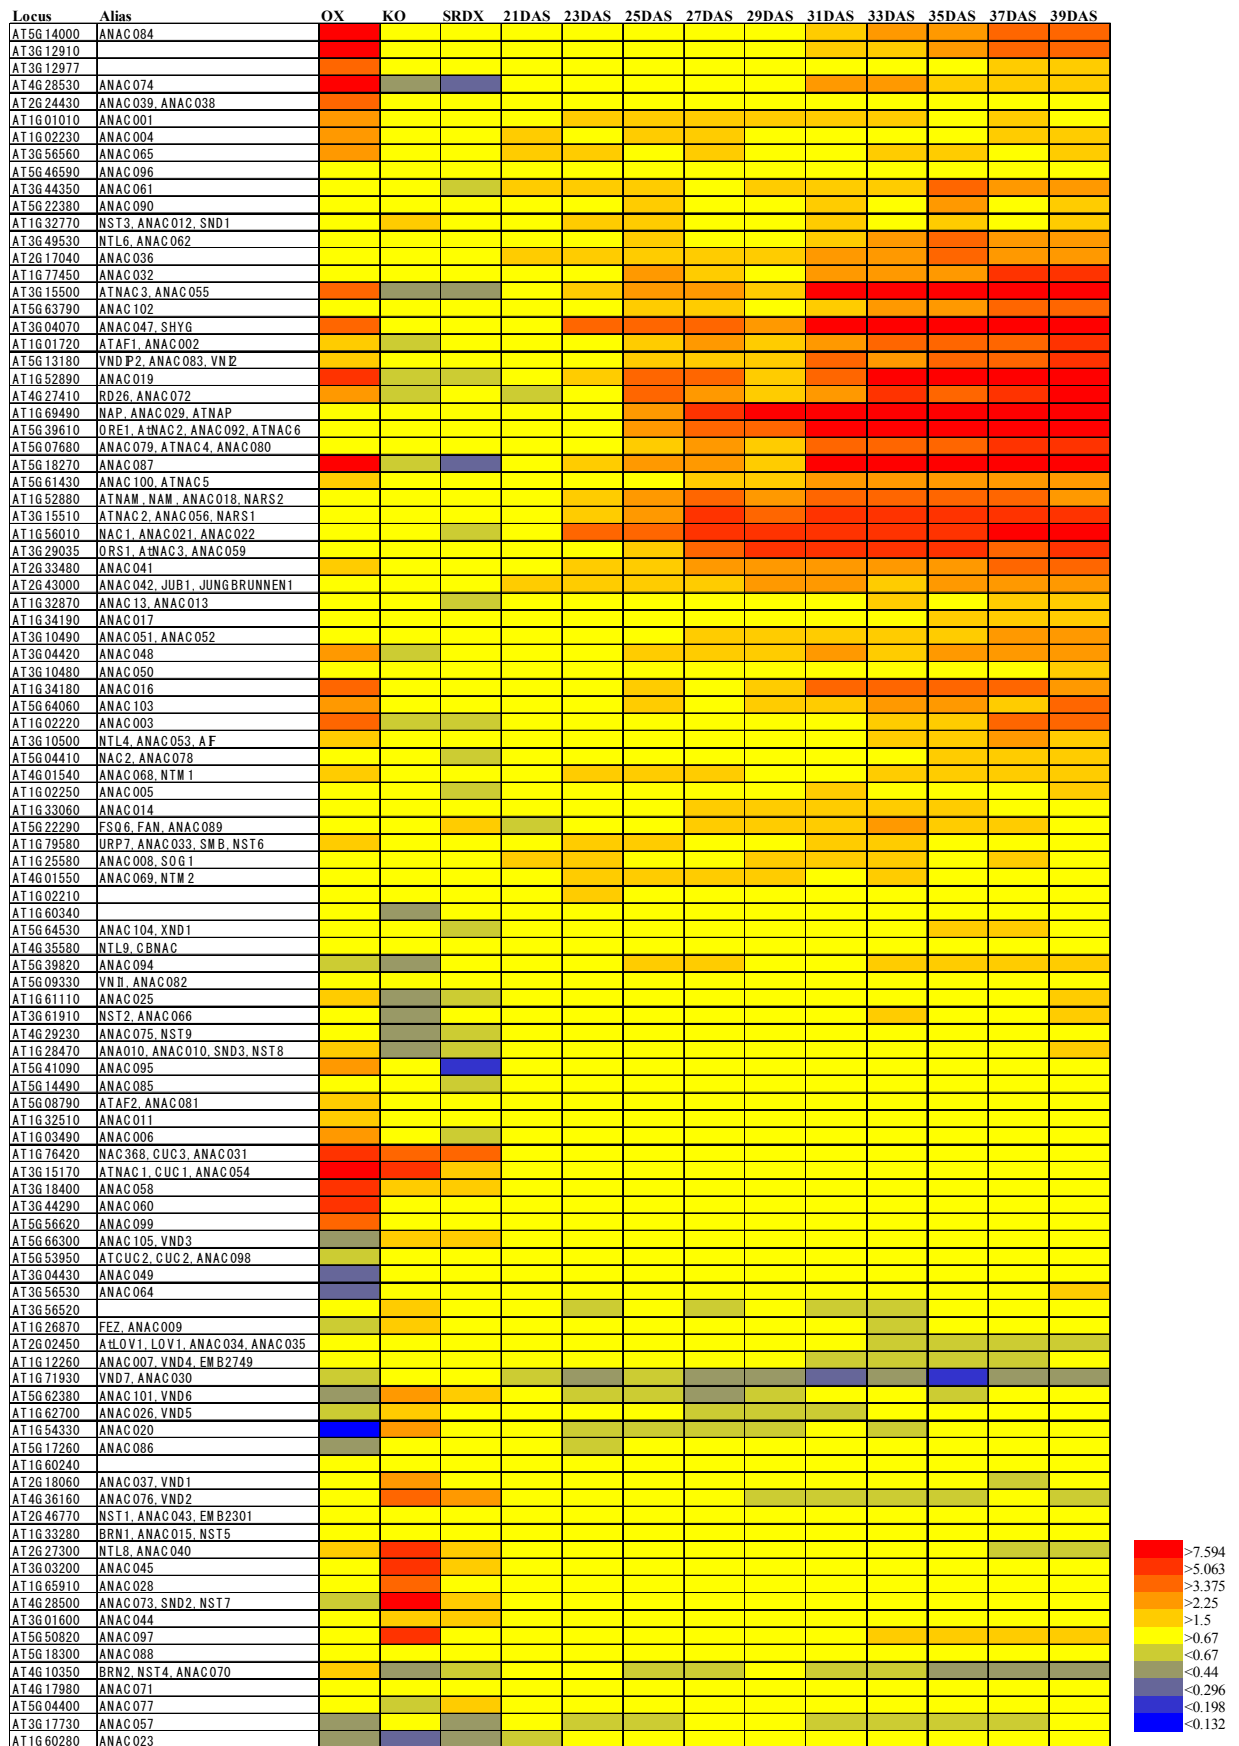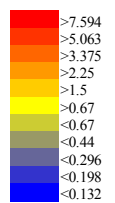

Supplementary Figure S7. Fold change of NAC transcription factor genes in the ANAC046OX, KO, and SRDX plants in addition to fold change in afternoon of 21, 23, 25, 27, 29, 31, 33, 35, 37, and 39 days after sowing (DAS) over one in afternoon of 19DAS.

## Supplementary Figure S8

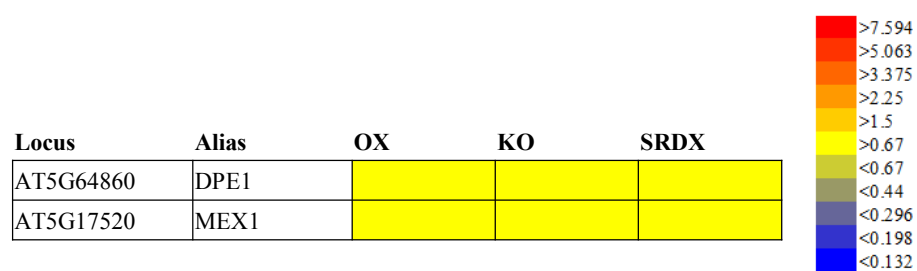

Supplementary Figure S8. Expression of *DPE1* and *MEX1* in the *ANAC046* OX, KO, and SRDX plants relative to WT plants.



## Supplementary Figure S9

| Locus     | Alias    | OX     | KO     | SRDX   |
|-----------|----------|--------|--------|--------|
| AT3G12500 | PR3      | >7.594 | <0.67  | >1.5   |
| AT4G16260 |          | >5.063 | <0.67  | <0.44  |
| AT3G15500 | ANAC055  | >3.375 | <0.67  | <0.44  |
| AT1G11190 | BFN1     | >2.25  | <0.198 | <0.198 |
| AT1G32960 | ATSBT3.3 | >1.5   | <0.67  | <0.44  |
| AT2G14620 | XTH10    | >0.67  | <0.67  | <0.44  |
| AT4G37430 | CYP81F1  | >0.67  | <0.198 | <0.44  |
| AT2G41850 | ADPG2    | >0.67  | <0.132 | <0.44  |
| AT4G11650 | ATOSM34  | >0.67  | <0.67  | <0.44  |
| AT1G62760 |          | >0.67  | <0.67  | <0.44  |
| AT1G15520 | ABCG40   | >0.67  | >1.5   | >1.5   |
| AT2G29470 | GST21    | >0.67  | >1.5   | >1.5   |
| AT3G60140 | BGLU30   | >0.67  | <0.67  | <0.44  |
| AT3G01420 | DIOX1    | >0.67  | <0.67  | <0.44  |
| AT4G37990 | ATCAD8   | >0.67  | <0.198 | >1.5   |
| AT2G02990 | RNS1     | >0.67  | <0.132 | <0.44  |
| AT3G57510 | ADPG1    | >0.67  | <0.67  | <0.198 |
| AT1G19250 | FMO1     | >0.67  | >1.5   | >1.5   |
| AT1G61566 | RALFL9   | >0.67  | <0.67  | <0.44  |
| AT2G47040 | VGD1     | >0.67  | <0.132 | <0.44  |
| AT1G02790 | PGA4     | >0.67  | <0.132 | <0.132 |

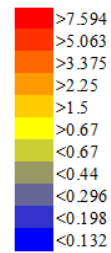

**Supplementary Figure S9. Expression of senescence-inducible genes dependent on salicylic acid signaling in the *ANAC046* OX, KO, and SRDX plants.** The list of senescence-inducible genes downregulated in the *NahG* plants (deficient in salicylic acid signaling) was obtained from Buchanan-Wollaston et al. (2005). The expression of these genes was upregulated during age-dependent senescence but not dark-induced senescence (Buchanan-Wollaston et al., 2005).

## Supplementary Figure S10

| Locus     | Alias    | OX | KO | SRDX |
|-----------|----------|----|----|------|
| AT4G28490 | RLK5     |    |    |      |
| AT4G35580 | NTL9     |    |    |      |
| AT3G13620 | PUT4     |    |    |      |
| AT3G28540 |          |    |    |      |
| AT4G10500 |          |    |    |      |
| AT1G47890 | AtRLP7   |    |    |      |
| AT2G19190 | FRK1     |    |    |      |
| AT2G33080 | AtRLP28  |    |    |      |
| AT5G24550 | BGLU32   |    |    |      |
| AT4G13920 | AtRLP50  |    |    |      |
| AT1G44130 |          |    |    |      |
| AT1G32960 | ATSBT3.3 |    |    |      |
| AT5G45890 | SAG12    |    |    |      |
| AT1G74710 | ICS1     |    |    |      |
| AT2G26400 | ARD      |    |    |      |
| AT1G33960 | AIG1     |    |    |      |
| AT3G28580 |          |    |    |      |
| AT1G19250 | FMO1     |    |    |      |
| AT4G23150 | CRK7     |    |    |      |
| AT1G35230 | AGP5     |    |    |      |
| AT4G04500 | CRK37    |    |    |      |
| AT1G21240 | WAK3     |    |    |      |
| AT3G47480 |          |    |    |      |
| AT3G53150 | UGT73D1  |    |    |      |
| AT1G14080 | FUT6     |    |    |      |
| AT3G07600 |          |    |    |      |
| AT5G11920 | ATCWINV6 |    |    |      |
| AT3G13100 | ABCC7    |    |    |      |
| AT5G39670 |          |    |    |      |
| AT3G28510 |          |    |    |      |
| AT3G24900 | AtRLP39  |    |    |      |

Color scale for fold change:

- >7.594
- >5.063
- >3.375
- >2.25
- >1.5
- >0.67
- <0.67
- <0.44
- <0.296
- <0.198
- <0.132

**Supplementary Figure S10. Expression of senescence-inducible genes dependent on jasmonic acid signaling, ethylene signaling, or both in the *ANAC046* OX, KO, and SRDX plants.** The list of senescence-inducible genes downregulated in the *coi1* mutant (deficient in jasmonic acid signaling) and *ein2* mutant (deficient in ethylene signaling) was obtained from Buchanan-Wollaston et al. (2005). Color indicates level of fold change in each transgenic/mutant plant against wild-type plant.

# Supplementary Table S1

Detailed fold change of ORE1- and/or ORS1-inducible genes in the ANAC046OX, KO, and SRDX plants shown in Supplementary Figure 5.

| Locus     | Alias                                | OX     | KO   | SRDX | Locus     | Alias                                     | OX     | KO   | SRDX |
|-----------|--------------------------------------|--------|------|------|-----------|-------------------------------------------|--------|------|------|
| AT3G59900 | ARGOS                                | 0.43   | 0.81 | 1.31 | AT4G19810 | ChC                                       | 8.21   | 0.57 | 0.71 |
| AT1G49500 |                                      | 0.63   | 0.72 | 1.29 | AT1G68450 | PDE337                                    | 129.66 | 0.3  | 0.43 |
| AT1G13080 | CYP71B2                              | 0.83   | 1.01 | 1.03 | AT3G61930 |                                           | 27.97  | 0.44 | 0.56 |
| AT2G21220 | SAUR12                               | 0.18   | 1.21 | 1.05 | AT5G39520 |                                           | 13.2   | 0.56 | 0.64 |
| AT4G35770 | ATSEN1, DIN1, SEN1                   | 0.91   | 1.02 | 0.99 | AT2G44380 |                                           | 2.31   | 0.82 | 0.88 |
| AT1G63260 | TET10                                | 0.93   | 1.19 | 0.96 | AT1G62760 |                                           | 169.14 | 0.38 | 0.57 |
| AT2G41730 |                                      | 0.79   | 1.19 | 0.95 | AT1G74000 | SS3                                       | 15.14  | 0.56 | 0.68 |
| AT3G48360 | ATBT2, BT2                           | 0.48   | 1.47 | 1.44 | AT2G38240 |                                           | 27.16  | 0.42 | 0.74 |
| AT1G49230 | AtATL78                              | 0.42   | 1.85 | 1.91 | AT1G80840 | ATWRKY40, WRKY40                          | 3.44   | 1.11 | 0.75 |
| AT2G28200 |                                      | 0.67   | 1.58 | 1.4  | AT5G61600 | ERF104                                    | 3.59   | 1.03 | 0.71 |
| AT1G58170 |                                      | 0.95   | 1.5  | 1.83 | AT1G09560 | PDGLP1, GLP5                              | 2.03   | 1.06 | 0.79 |
| AT3G10525 | LGO, SMR1                            | 0.84   | 1.77 | 1.71 | AT4G25810 | XTH23, XTR6                               | 14.07  | 1.34 | 0.72 |
| AT5G62960 |                                      | 0.76   | 4.68 | 3.78 | AT2G35980 | NHL10, YLS9, ATNHL10                      | 8.29   | 1.24 | 0.88 |
| AT5G23750 |                                      | 0.73   | 2.29 | 1.52 | AT2G45220 | PME17                                     | 37.41  | 0.9  | 0.64 |
| AT5G64620 | ATC/VIF2, C/VIF2                     | 0.83   | 1.55 | 1.3  | AT4G39670 |                                           | 9.85   | 0.95 | 0.71 |
| AT1G08810 | ATMYB60                              | 0.96   | 1.44 | 1.16 | AT3G61190 | BAP1                                      | 12.02  | 1    | 0.74 |
| AT4G04490 | CRK36                                | 4.5    | 0.95 | 0.5  | AT5G01520 | AtAIRP2, AIRP2                            | 2.06   | 1.01 | 0.9  |
| AT1G05450 |                                      | 5.12   | 0.79 | 0.31 | AT5G14000 | ANAC084                                   | 16.18  | 1.05 | 0.81 |
| AT4G34630 |                                      | 1.71   | 0.98 | 0.7  | AT1G74590 | ATGSTU10                                  | 7.43   | 1.05 | 0.83 |
| AT1G72790 |                                      | 1.62   | 0.91 | 0.53 | AT3G21840 | ASK7                                      | 19.22  | 1.02 | 0.87 |
| AT1G55760 |                                      | 1.78   | 0.92 | 0.58 | AT1G79320 | AtMCP2c, ATMC6                            | 7.97   | 0.8  | 0.82 |
| AT4G26470 |                                      | 1.63   | 0.89 | 0.64 | AT2G29470 | GST21, ATGSTU3                            | 19.25  | 0.7  | 0.8  |
| AT5G50260 | CEP1                                 | 129.29 | 0.23 | 0.01 | AT3G06210 |                                           | 2.15   | 0.89 | 0.95 |
| AT5G18640 |                                      | 1.39   | 0.87 | 0.78 | AT1G80450 |                                           | 3.85   | 0.89 | 0.84 |
| AT4G18425 |                                      | 18.16  | 0.21 | 0.08 | AT5G13080 | ATWRKY75, WRKY75                          | 17.61  | 0.78 | 0.73 |
| AT2G32150 |                                      | 1.49   | 0.8  | 0.69 | AT3G13950 |                                           | 12.85  | 0.86 | 0.77 |
| AT1G26820 | RNS3                                 | 5.42   | 0.35 | 0.14 | AT3G48580 | XTH11                                     | 16.09  | 0.86 | 0.69 |
| AT1G79520 |                                      | 2.75   | 0.52 | 0.6  | AT3G13672 | SINA2                                     | 3.37   | 0.87 | 0.83 |
| AT4G13250 | NYC1, NYC                            | 3.12   | 0.46 | 0.56 | AT2G32660 | AIRLP22                                   | 38.7   | 0.6  | 0.58 |
| AT5G40690 |                                      | 3.22   | 0.43 | 0.53 | AT2G23110 |                                           | 28.11  | 0.93 | 1.04 |
| AT3G49210 |                                      | 2.16   | 0.57 | 0.65 | AT3G22600 | LTPG5                                     | 23.53  | 0.88 | 0.99 |
| AT2G25625 |                                      | 3.23   | 0.39 | 0.55 | AT3G11340 | UGT76B1                                   | 3.52   | 1.04 | 1.05 |
| AT3G49620 | DIN11                                | 1.78   | 0.66 | 0.69 | AT1G69930 | ATGSTU11                                  | 27.31  | 1.18 | 1.1  |
| AT1G73750 |                                      | 3.42   | 0.42 | 0.48 | AT2G47950 |                                           | 15.12  | 0.74 | 1.1  |
| AT5G54570 | BGLU41                               | 5.95   | 0.35 | 0.38 | AT2G01890 | PAP8, ATPAP8                              | 1.73   | 0.37 | 0.75 |
| AT1G07610 | MTIC                                 | 2.77   | 0.54 | 0.55 | AT1G66400 | CML23                                     | 1.72   | 0.3  | 0.55 |
| AT3G62590 |                                      | 4.3    | 0.44 | 0.44 | AT5G02420 |                                           | 2.1    | 0.26 | 0.54 |
| AT2G26670 | GUN2, ATHO1, TED4, HY6, HY1          | 2.2    | 0.65 | 0.63 | AT4G21980 | ATG8A, APG8A                              | 1.29   | 0.47 | 0.68 |
| AT1G73000 | RCAR13, PYL3                         | 20.81  | 0.2  | 0.18 | AT5G59845 |                                           | 1.23   | 0.47 | 0.72 |
| AT5G51260 |                                      | 1.65   | 0.76 | 0.73 | AT1G12640 | LPCAT1, AtLPLAT1                          | 1.56   | 0.58 | 0.62 |
| AT5G43060 | RD21B                                | 2.09   | 0.6  | 0.55 | AT3G06420 | ATG8H                                     | 2.11   | 0.4  | 0.45 |
| AT2G14095 |                                      | 11.18  | 0.22 | 0.15 | AT5G59840 |                                           | 1.31   | 0.72 | 0.78 |
| AT1G11190 | ENDO1, BFN1                          | 9.63   | 0.25 | 0.2  | AT4G25700 | BCH1, BI, CHY1, BETA-OHASE1, BETA-OHASE 1 | 1.66   | 0.52 | 0.6  |
| AT5G04200 | AIMCP2f, ATMC9                       | 7.44   | 0.3  | 0.25 | AT5G54870 |                                           | 2.24   | 0.37 | 0.45 |
| AT2G25940 | ALPHA-VPE, ALPHA-VPE                 | 4.57   | 0.37 | 0.35 | AT3G16440 | ATMLP-300B, MEE36                         | 6.53   | 0.1  | 0.16 |
| AT1G02660 |                                      | 3.16   | 0.55 | 0.45 | AT5G38610 |                                           | 1.83   | 0.52 | 0.59 |
| AT5G25820 |                                      | 4.02   | 0.53 | 0.49 | AT3G23920 | AtBAM1, BAM1, BMY7, TR-BAMY               | 2.19   | 0.41 | 0.52 |
| AT3G61960 |                                      | 1.74   | 0.79 | 0.73 | AT3G21550 | AtDMP2                                    | 3.32   | 0.25 | 0.35 |
| AT2G34930 |                                      | 2.95   | 0.66 | 0.57 | AT3G05400 |                                           | 3.64   | 0.23 | 0.4  |
| AT1G19200 |                                      | 3.02   | 0.56 | 0.59 | AT1G55265 |                                           | 1.39   | 0.7  | 0.8  |
| AT3G25290 |                                      | 3.06   | 0.52 | 0.61 | AT1G74020 | SS2                                       | 2.33   | 0.42 | 0.6  |
| AT1G53100 |                                      | 1.79   | 0.77 | 0.8  | AT1G29160 | AtDofL_5                                  | 1.46   | 0.66 | 0.62 |
| AT4G22920 | ATNYE1, SGR1, STAY-GREEN1            | 4.3    | 0.53 | 0.58 | AT3G29250 | AtSDR4                                    | 2.15   | 0.45 | 0.41 |
| AT1G09240 | ATNAS3                               | 2.46   | 0.67 | 0.67 | AT1G55240 |                                           | 4.21   | 0.26 | 0.17 |
| AT3G01830 |                                      | 2.08   | 0.61 | 0.73 | AT5G08480 |                                           | 5.39   | 0.21 | 0.15 |
| AT2G31945 |                                      | 5.51   | 0.32 | 0.49 | AT5G66730 | CGLD27                                    | 1.41   | 0.75 | 0.77 |
| AT2G02990 | RNS1, ATRNS1                         | 19.56  | 0.18 | 0.38 | AT3G19900 |                                           | 1.94   | 0.53 | 0.56 |
| AT4G29570 |                                      | 10.66  | 0.23 | 0.45 | AT1G19850 | IAA24, ARF5, MP                           | 2.95   | 0.34 | 0.38 |
| AT1G02470 |                                      | 4.11   | 0.41 | 0.64 | AT1G48260 | CIPK17, SnRK3.21                          | 2.9    | 0.39 | 0.39 |
| AT3G21520 | AtDMP1                               | 4.79   | 0.4  | 0.63 | AT4G34320 |                                           | 10.17  | 0.16 | 0.17 |
| AT1G74010 |                                      | 4.39   | 0.45 | 0.65 | AT5G01820 | PKS24, CIPK14, ATSR1, SnRK3.15, ATCIPK14  | 1.79   | 0.33 | 0.43 |
| AT1G56060 |                                      | 2.1    | 0.65 | 0.78 | AT1G47128 | RD21A, RD21                               | 1.61   | 0.42 | 0.55 |
| AT5G13170 | SAG29, SWEET15, AtSWEET15            | 47.51  | 0.13 | 0.27 | AT5G56540 | ATAGP14, AGP14                            | 5.68   | 0.04 | 0.11 |
| AT3G51090 |                                      | 6.29   | 0.47 | 0.57 | AT1G23040 |                                           | 1.43   | 0.55 | 0.54 |
| AT1G09380 | UMAMIT25                             | 23.72  | 0.22 | 0.37 | AT1G28470 | ANA010, ANAC010, SND3, NST8               | 1.64   | 0.42 | 0.48 |
| AT5G13180 | VNDIP2, ANAC083, VNI2                | 1.56   | 0.82 | 0.87 | AT3G26100 |                                           | 1.92   | 0.33 | 0.37 |
| AT4G18980 | AtS40-3                              | 8.57   | 0.38 | 0.59 | AT5G26940 | DPD1                                      | 1.55   | 0.45 | 0.49 |
| AT1G45145 | TRX-h5, LIV1, ATTRX5, ATH5           | 2.73   | 0.47 | 0.88 | AT4G18910 | ATNLM2, NIP1-2, NLM2                      | 1.11   | 0.76 | 0.78 |
| AT1G53740 | RS1, ATSP1                           | 3.98   | 0.93 | 0.65 | AT5G56980 |                                           | 1.31   | 0.53 | 0.55 |
| AT2G17710 |                                      | 3.55   | 0.88 | 0.68 | AT5G14420 | RGLG2                                     | 1.52   | 0.58 | 0.51 |
| AT5G16570 | GLN1-4                               | 5.48   | 0.84 | 0.59 | AT1G02640 | AtBXL2, BXL2                              | 1.5    | 0.6  | 0.49 |
| AT3G14360 |                                      | 3.55   | 0.82 | 0.65 | AT4G12580 |                                           | 1.38   | 0.67 | 0.53 |
| AT5G64120 | AtPRX71                              | 2.34   | 0.91 | 0.73 | AT5G49710 |                                           | 1.1    | 0.82 | 0.74 |
| AT1G23330 |                                      | 3.24   | 0.81 | 0.74 | AT5G07560 | ATGRP20, GRP20                            | 1.11   | 0.66 | 0.63 |
| AT2G32680 | AtRLP23                              | 2.01   | 0.89 | 0.82 | AT1G73330 | ATDR4                                     | 1.57   | 0.41 | 1.14 |
| AT1G15520 | ATABCG40, ABCG40, PDR12, ATPDR12     | 3.66   | 0.79 | 0.7  | AT4G15700 |                                           | 1.93   | 0.72 | 1.48 |
| AT5G63970 | RGLG3                                | 6.41   | 0.72 | 0.71 | AT4G21850 | ATMSRB9                                   | 2.46   | 1.31 | 1.03 |
| AT3G56170 | CAN1, CAN                            | 2.43   | 0.85 | 0.86 | AT4G16620 | UMAMIT8                                   | 13.33  | 1.57 | 1.18 |
| AT1G20180 |                                      | 149.28 | 0.38 | 0.33 | AT3G15810 |                                           | 1.57   | 1.08 | 1.06 |
| AT1G15380 | GLY14                                | 11.46  | 0.72 | 0.61 | AT3G25870 |                                           | 2.9    | 1.22 | 0.99 |
| AT1G32350 | AOX1D                                | 4.74   | 0.79 | 0.71 | AT1G19250 | FMO1                                      | 4.62   | 1.74 | 0.82 |
| AT2G29460 | GST22, ATGSTU4                       | 2.92   | 0.89 | 0.78 | AT4G27280 |                                           | 3.69   | 1.45 | 0.79 |
| AT4G18550 | AtDSEL                               | 31.09  | 0.26 | 0.27 | AT5G17450 | HIPP21                                    | 1.44   | 1.14 | 0.92 |
| AT2G44010 |                                      | 6.79   | 0.51 | 0.49 | AT4G15680 |                                           | 17.78  | 1.11 | 1.81 |
| AT5G13820 | HPPBF-1, ATTBP1, ATBP-1, ATBP1, TBP1 | 4.25   | 0.66 | 0.52 | AT1G19610 | LCR78, PDF1.4                             | 7.83   | 0.85 | 2.02 |
| AT3G52780 | ATPAP20, PAP20                       | 41.46  | 0.29 | 0.23 | AT3G21830 | ASK8                                      | 15.32  | 1.26 | 3.2  |
| AT2G30770 | CYP71A13                             | 5.25   | 0.6  | 0.5  | AT5G23530 | AtXCXE18                                  | 3.51   | 2.81 | 1.52 |
| AT1G08920 | ESL1                                 | 4.48   | 0.63 | 0.55 | AT3G21850 | ASK9                                      | 2.47   | 2.08 | 1.38 |
| AT5G38710 |                                      | 4.79   | 0.68 | 0.6  | AT5G75660 | XTH22, TCH4                               | 1.91   | 1.72 | 1.2  |
| AT2G46950 | CYP709B2                             | 20.52  | 0.45 | 0.33 | AT2G16890 |                                           | 1.84   | 1.67 | 0.88 |
| AT4G16260 |                                      | 11.27  | 0.48 | 0.6  | AT2G13810 | AtALD1, EDTS5, ALD1                       | 1.86   | 1.53 | 1    |
| AT3G01420 | PADOX-1, ALPHA-DOXI, DIOX1           | 22.85  | 0.36 | 0.46 | AT3G21860 | ASK10                                     | 7.03   | 2.77 | 1.14 |
| AT4G01870 |                                      | 3.04   | 0.72 | 0.72 | AT2G40230 |                                           | 2.74   | 2.6  | 2.81 |
| AT3G05180 |                                      | 1.98   | 0.8  | 0.82 | AT4G30670 |                                           | 2.16   | 2.24 | 1.73 |
| AT3G45010 | SCPL48                               | 6.24   | 0.55 | 0.55 | AT4G10850 | SWEET7, AtSWEET7                          | 1.4    | 1.72 | 1.5  |
| AT4G04460 |                                      | 41.86  | 0.39 | 0.35 | AT3G19030 |                                           | 0.75   | 0.45 | 1.19 |
| AT2G05910 |                                      | 9.7    | 0.55 | 0.55 | AT2G40670 | ARR16                                     | 0.5    | 0.45 | 0.75 |
| AT4G25000 | AMY1, AMY3, ATAMY1                   | 8.39   | 0.49 | 0.89 | AT1G26920 |                                           | 0.76   | 0.8  | 0.84 |
| AT5G45630 |                                      | 21.38  | 0.34 | 0.6  | AT5G39610 | ORE1, ANAC2, ANAC092, ATNAC6              | 0.67   | 0.71 | 0.67 |
| AT2G33480 | ANAC041                              | 2.03   | 0.78 | 0.91 | AT2G42890 | AML2, MEI2                                | 0.94   | 0.69 | 0.68 |
| AT1G17020 | ATSRG1, SRG1                         | 17.62  | 0.48 | 0.66 | AT1G10060 | BAT1, ATBCAT-1                            | 0.88   | 0.54 | 0.64 |
| AT4G11650 | ATOSM34                              | 52.9   | 0.34 | 0.55 | AT3G14770 | SWEET2, AtSWEET2                          | 0.92   | 0.57 | 0.56 |
| AT4G19810 | ChC                                  | 8.21   | 0.57 | 0.71 | AT2G38480 |                                           | 0.75   | 0.41 | 0.49 |
| AT1G68450 | PDE337                               | 129.66 | 0.3  | 0.43 | AT5G04390 |                                           | 0.95   | 0.87 | 0.85 |
| AT3G61930 |                                      | 27.97  | 0.44 | 0.56 | AT2G39890 | ATPROT1, ProT1                            | 1.07   | 0.39 | 0.52 |
| AT5G39520 |                                      | 13.2   | 0.56 | 0.64 | AT2G25735 |                                           | 0.97   | 0.48 | 0.71 |
| AT2G44380 |                                      | 2.31   | 0.82 | 0.88 | AT2G15830 |                                           | 0.96   | 0.46 | 0.76 |

## Supplementary Table S2

Primers used for vector construction for Y1H screening and transient effector–reporter analysis

| Name            | Sequence (5'→3')                           |
|-----------------|--------------------------------------------|
| CLH1-pDONR-F    | GGGGACAACCTTTGTATAGAAAAGTTGTTCTCTGTTTTTCT  |
| CLH1-pDONR-R    | GGGGACTGCTTTTTTTGTACAAACTTGGTGTATTAACATA   |
| CLH2-pDONR-F    | GGGGACAACCTTTGTATAGAAAAGTTGGACTCATCAGAGTG  |
| CLH2-pDONR-R    | GGGGACTGCTTTTTTTGTACAAACTTGGTTTTTTTTGTTCTT |
| CYP89A9-pDONR-F | GGGGACAACCTTTGTATAGAAAAGTTGCATTTGGGAAATTT  |
| CYP89A9-pDONR-R | GGGGACTGCTTTTTTTGTACAAACTTGGTATCTTTTTTTAG  |
| HCAR-pDONR-F    | GGGGACAACCTTTGTATAGAAAAGTTGCGGTGGTGAAAATG  |
| HCAR-pDONR-R    | GGGGACTGCTTTTTTTGTACAAACTTGGATCTTTTAGGAAC  |
| MES16-pDONR-F   | GGGGACAACCTTTGTATAGAAAAGTTGTCCGGTGAGATTCG  |
| MES16-pDONR-R   | GGGGACTGCTTTTTTTGTACAAACTTGGTGCATGAATCTTG  |
| NOL-pDONR-F     | GGGGACAACCTTTGTATAGAAAAGTTGTGAATCTCTGTAGG  |
| NOL-pDONR-R     | GGGGACTGCTTTTTTTGTACAAACTTGGTACAGAAGCTCAA  |
| NYC1-pDONR-F    | GGGGACAACCTTTGTATAGAAAAGTTGTTATTGTGTCACAG  |
| NYC1-pDONR-R    | GGGGACTGCTTTTTTTGTACAAACTTGGAGCTATGGAAGAA  |
| PAO-pDONR-F     | GGGGACAACCTTTGTATAGAAAAGTTGTCTCTTTCGTTTAT  |
| PAO-pDONR-R     | GGGGACTGCTTTTTTTGTACAAACTTGGTTTTCTAGTTTGG  |
| PPH-pDONR-F     | GGGGACAACCTTTGTATAGAAAAGTTGTGTCTAAGTTATTA  |
| PPH-pDONR-R     | GGGGACTGCTTTTTTTGTACAAACTTGGAAAGCGAGGAAAAA |
| RCCR-pDONR-F    | GGGGACAACCTTTGTATAGAAAAGTTGAGAACTCTTTATCA  |
| RCCR-pDONR-R    | GGGGACTGCTTTTTTTGTACAAACTTGGTTTTTATGTGGCT  |
| SGR1-pDONR-F    | GGGGACAACCTTTGTATAGAAAAGTTGGAAAGAAGAAGAAA  |
| SGR1-pDONR-R    | GGGGACTGCTTTTTTTGTACAAACTTGGCTCTGCTCTCTTG  |
| SGR2-pDONR-F    | GGGGACAACCTTTGTATAGAAAAGTTGGTTAATCGAGTTGG  |
| SGR2-pDONR-R    | GGGGACTGCTTTTTTTGTACAAACTTGGCTTTGCTTGTCT   |

## Supplementary Table S3

Primers used for vector construction for production of transgenic plants

| Name           | Sequence (5'→3')          |
|----------------|---------------------------|
| ANAC046-F      | GATGGTGGAAGAAGGCGGCGTAG   |
| ANAC046-SRDX-R | GCTAGTATATAAATCTTCCCAGAAG |
| ANAC046-OX-R   | TTAGCTAGTATATAAATCTTCCCAG |

## Supplementary Table S4

Primers used for quantitative real-time PCR

| Name         | Sequence (5'→3')         |
|--------------|--------------------------|
| ANAC046-RT-F | GGTTTCGGTTTCACCCTACTGATG |
| ANAC046-RT-R | ATGGCTCGTTCTTGTTGAGGTC   |
| Actin-RT-F   | TCCCGCTATGTATGTCGC       |
| Actin-RT-R   | ACCCTCGTAGATTGGCAC       |
